# Supplementary material for: Genome-wide identification, expression pattern and interacting protein analysis of INDETERMINATE DOMAIN (IDD) gene family in Phalaenopsis equestris
Source: PeerJ. 2024 Sep 25;12:e18073. doi: 10.7717/peerj.18073 (PMC11438434; doi:10.7717/peerj.18073)
Supplement: Supplemental Information 3 [file peerj-12-18073-s003.xlsx]

## Sheet: Sheet1
Table S1 Accenssion numbers of OsIDDs, AtIDDs
Genes	Accession numbers
OsID1	LOC_Os10g28330
OsIDD1	LOC_Os03g10140
OsIDD2	LOC_Os01g09850
OsIDD3	LOC_Os09g38340
OsIDD4	LOC_Os02g45054
OsIDD5	LOC_Os07g39310
OsIDD6	LOC_Os08g44050
OsIDD7	LOC_Os02g31890
OsIDD8	LOC_Os01g14010
OsIDD9	LOC_Os01g70870
OsIDD10	LOC_Os04g47860
OsIDD11	LOC_Os01g39110
OsIDD12	LOC_Os08g36390
OsIDD13	LOC_Os09g27650
OsIDD14	LOC_Os03g13400
AtIDD1	At5G66730
AtIDD2	At3G50700
AtIDD3	At1G03840
AtIDD4	AT2G02080
AtIDD5	AT2G02070
AtIDD6	AT1G14580
AtIDD7	At1G55110
AtIDD8	At5G44160
AtIDD9	At3G45260
AtIDD10	At5G03150
AtIDD11	At3G13810
AtIDD12	At4G02670
AtIDD13	At5G60470
AtIDD14	AT1G68130
AtIDD15	AT2G01940
AtIDD16	AT1G25250
