# Supplementary material for: Genome-wide identification, expression pattern and interacting protein analysis of INDETERMINATE DOMAIN (IDD) gene family in Phalaenopsis equestris
Source: PeerJ. 2024 Sep 25;12:e18073. doi: 10.7717/peerj.18073 (PMC11438434; doi:10.7717/peerj.18073)
Supplement: Supplemental Information 4 [file peerj-12-18073-s004.xlsx]

## Sheet: Sheet1
Table S2 List of primers used in this study
Primer names	Sequences (5’→3’)
PeIDD1-qPCR-F	CCAAAGCTGACTATAACGGAGG
PeIDD1-qPCR-R	GAGGCTGGTGTAGGTATTGAAG
PeIDD2-qPCR-F	TGGAAAGCTCATTCGAAGATCTG
PeIDD2-qPCR-R	AGCAGTGGGTGTTGGTTAAC
PeIDD3-qPCR-F	CATTTGAAGACTTGCGGGAC
PeIDD3-qPCR-R	TCCTGGTGTTCGATGAAAGC
PeIDD4-qPCR-F	TCGCTGTGATTGTGGAACTC
PeIDD4-qPCR-R	CTGGGAAGAGAACTGGATTTTG
PeIDD5-qPCR-F	TCATCTTAAGACTTGCGGGAC
PeIDD5-qPCR-R	GGGAGGTTAGTTGCTGAGAAG
PeIDD6-qPCR-F	CTTCTCTGTACTTCGGATGCAG
PeIDD6-qPCR-R	GAGATTACCTCCGCGTCAG
PeIDD7-qPCR-F	CTAATCTGATGTCACCCGCTG
PeIDD7-qPCR-R	TGTTGCAGATCTCGCATACG
PeIDD8-qPCR-F	TCGATGTGATTGTGGAACCATC
PeIDD8-qPCR-R	GTAGTCTCTGATGTTGGCCG
PeIDD9-qPCR-F	TCTGTGGAACGAGGGAGTATC
PeIDD9-qPCR-R	GAGGGTTTGTTAGTGGATTCAATG
PeIDD10-qPCR-F	TGACCTCCAAGACCTTATCTCC
PeIDD10-qPCR-R	TTCCCACAGACCTCACAAAC
