# Supplementary material for: Genome-wide identification, expression pattern and interacting protein analysis of INDETERMINATE DOMAIN (IDD) gene family in Phalaenopsis equestris
Source: PeerJ. 2024 Sep 25;12:e18073. doi: 10.7717/peerj.18073 (PMC11438434; doi:10.7717/peerj.18073)
Supplement: Supplemental Information 5 [file peerj-12-18073-s005.xlsx]

## Sheet: Sheet1
Table S3 Full amino acid sequences of PeIDD proteins
Gene ID	Protein accession number	Putative PeIDD Name	full amino acid sequences
LOC110025435	XP_020581568.1	PeIDD1	MPVEFEGSSYRTMSNSASGETSVSSGHLTAPPSLPPPAKKKRNLPGMPDPNAEVIALSPKTLMATNRFVCEICNKGFQRDQNLQLHRRGHNLPWKLRQRTGKEARKRVYVCPEPGCVHHDPSRALGDLTGIKKHFCRKHGEKKWKCDKCLKKYAVQSDWKAHSKTCGTREYRCDCGTLFSRRDSFITHRAFCDALAEESARTQTNATAAEKEPKLTITEAASLQENQMAPPPPDQKEPENTPGILQYLHQPPLAPVSISMNCSNSSCTTTSGGSNSLFASTAATQRTSFSDLISSMSRSEVEPPSLCLSSNGPSSLFPPAADRRQFSGMASSAHMSATALLQKAAQMGAAASGSSFLRGFGLAESSSPLAIGGGGDSQWNEPASISAGLGLGLPYDNGC…
LOC110019698	XP_020573141.1	PeIDD2	MLKGLIISSQHQLVDENMSNLTSASGEASVSSNQQSSFASPNPNPNTQPSKKKRNLPGNPDPEAEVMALSPKTLMATNRFICEICNKGFQRDQNLQLHRRGHNLPWKLKQRTSKEVRKKVYICPEVTCVHHDPSRALGDLTGIKKHFSRKHGEKKWKCDKCSKKYAVQSDWKAHSKICGTREYRCDCGTLFSRRDSFITHRAFCDALAEESARVNQHPLLFTNQPLEGQMQPLNMRQDIPPWLGVNQLNIPSSIYGSRLDQECGQENHLMQQQPVSTMAHMSATALLQKAAQMGATMSRPTSIHSQMVGHSGGNVNAHNNGVFGLELSSSHHNENIGVNGGTSLIHDLMINSLPQAGSGFQLGSFNEHYGGGGGGGGNDGMTRDFLGLRAFSHKDLLNL…
LOC110019772	XP_020573251.1	PeIDD3	MFIIPSSNPPEESEQPPSSALNAATTKKKRRPAGTPDPEAEVISLSPHTLLESERYVCEICLQSFRRSQNLQMHLRRHRVPWKLAAKRTESKKRVFVCPEASCLHHHPRHALGDLVGIKKHFRRKHSGNRQWGCARCSKAYAVLSDYKAHLKTCGTRGHCCDCGRVFSRVEAFIEHQDSCTAPATQSPPSPPPPPPP
LOC110020132	XP_020573780.1	PeIDD4	MKAFIFPPQLQLEENMSNLTSASCEASVSSSFASPNQNPNPPPTKKKRNLPGNPDPEAEVIALSPKSLMATNRFVCEICNKGFQRDQNLQLHRRGHNLPWKLKQRTSKEVRKKVYICPEVTCVHHDASRALGDLTGIKKHFCWKHGEKKWKCDKCAKKYAVQSDWKAHSKICGTREYRCDCGTLFSRRDSFITHRAFCDALAEESARAITTNPLMNQNPVLFPAPPPPPINPPPQFPHFIKSATPETNQNLQDQLNTLKKETQNPPSWLNYHDFPFSLYATTISQENAIPHHLISAPAPHMSATALLQKAAQMGAISSSSNKSMPQGSVFDDNGRREEGRNGNDGLTRDFLGLRPISHRDLLNMAGIETCITTSYENQKKKSWLEN
LOC110022195	XP_020576678.1	PeIDD5	MFTISSSPLPPAQSEPIITKKKRRPAGTPDPDAEVVSLSPRTLLESDRYVCEICNQGFQRDQNLQMHRRRHKVPWKLLKRESTVEPVAKKRVFVCPEPSCLHHDPCHALGDLVGIKKHFRRKHSANKQWACDRCCKAYAVHSDYKAHLKTCGTRGHSCDCGRVFSRVETFIEHQDSCSTGRRRSEPCTSQQLTSLSHPISSPTPSTDTPPAPHPPPPPPYPKFAFLSPPSSQNFHLPHLLPPPSTELDLSIGPPLPRRTHIEDKILSAMTASDEARRQVQMAEKELAAAQRIRQQARVEFEKACALRAAAARQINAILLQITCHDCQQRRRSKAAVTTVVDGGDGEQQLWPKVPPFKL
LOC110023230	XP_020578197.1	PeIDD6	MQILEIIVFFWNKLEENTCILLAWFQFGLLCTSDAVFLPAETPAMSGIPNSRPPTARKKRNLPGNPDPDAEVISLSPATLMAPNRFLCEICNRGFQREQNLQLHRRGHNLPWKLRQHPPGGPPARKRVYVCPEPSCVNHDPARALGDLTGIKKHFCRKHGEKKWKCERCGKRYAVQSDHKAHSKTCGSREYRCNCGTLFSRKDSFVTHRAFCDALTRDSAANESLSCASDETPSEMAPPPPPAAYMSATALLQKAAEMGAAASAGSSSMLMAGLLRSTKGKTRDFLGMGRDDGGGRSMEEVARFGSLGSGMEFVGTGTSYNAAGYN
LOC110023669	XP_020578849.1	PeIDD7	MASGEAFRVPSSSSSMLPFSYDQNPNPNLMSPAAAPLKKKRNLPGTPDPDAEVIALSPKTLMATNRFVCEICNKGFQRDQNLQLHRRGHNLPWKLRQRQPGGSPARKRVYVCPEPNCVHHDPARALGDLTGIKKHFSRKHGEKKWKCDRCGKRYAVNSDYKAHSKTCGTREYRCDCGTLFSRKDSFVTHRAFCDALMQEAAAPAADSVSNGSDEKAALNLWVNRESQPPPSAGAVAGAGISATAVVQKAGGRDGGADVLIVVFDVI
LOC110025314	XP_020581388.1	PeIDD8	MSDVIEEEKHNRAALMAAMRKTETGIPTEIKKRRNPPGNPDPDAQVVALSPRTLLATNRYICEVCHRGFQRDQNLQLHRRGHNLPWKLKLKSSTEPKKRVYVCPELTCVHHDPNRALGDITGIKKHYSRKHGEKKWKCDKCSKKYAVQSDWKAHSKNCGTKEYRCDCGTIFTRKDSFVTCRAFCGAPAEKNYRTDHGLAAMAGNLPGQHQRLLSPSMQCLGSSITDNKINILGSETNTSNSLKFVSLNSLMQTSSNTLYNTGSMSMGSSIMSATALLQKASEMGVKISDESTSPVLFGGFTAFSNTNTETGMMRDFVNSYNNNDAQCLNVAEASSEAMNARFVPSSAGCPFVGVQNMFQTSSKGNADGSGFRTTTVRFPFGRETKIDMNNGGNLGEDNV…
LOC110029694	XP_020587765.1	PeIDD9	MNGFTVPLHQQLMEENMSNLTSASGDASFSSNPSPMNQQAAKKKRNLPGNPDPEAEVIALSPKTLMATNRFVCEICNKGFQRDQNLQLHRRGHNLPWKLKQRSNKEVRKKVYYCPEVTCVHHDPTRALGDLTGIKKHFSRKHGEKKWKCEKCSKKYAVQSDWKAHSKICGTREYRCDCGTLFSRRDSFITHRAFCDALAEESARNISTLNPLTNPLLFHPPPPPSFDPSSLPLQTHFPHLIRTIANETYQTNTCNPNINNNHTLQDLTLKTEQQQHHIPSWLSTTTTSSIYSPVLEQNHFIHDSHQSLPPSYPLPQPHISATALLQKAAQMGSTMSRPSPIHSQMAGHNNGDLVLPSSPIEKAFVNGSTASNHFLQMMNSFTQATGYRENEDGSNGGVG…
LOC110032973	XP_020592440.1	PeIDD10	MEGFAAQNTQDVDLYSNSTASDLQDLISSNPNRAKKKRSITGNLDPNAEVIALSPKSLLAKNKFVCEVCGKGFQRDQNLQLHKRGHNLPWKLKQRQNNEVVRRKVYICPEPSCSNHDPSRALGDLAGIKKHFSRKHGEKRWSCDKCSKKYAVLSDWKAHSKICGTKEYRCDCGTIFSRRDGLITHKAFCEVLAIENYRRMMRTSPFNQPFLPHPTALHNLDSSTSAGLIPEIPELISTATTSPNHHHINYINHSIHSSNLCGHLKPSPLPSLSFSATALQQKVTEMSSSVTRPSELHALFSSNSQEWSNGDFGHGTSVSTPLQLQSFLSCSEFVYPNEEPMGGLVMSAKREEGREEDFRVAMNYAGDQTGRNESTRDFLRLRVALHEELLNLSAVETCM…
