# Supplementary material for: Genome-wide identification, expression pattern and interacting protein analysis of INDETERMINATE DOMAIN (IDD) gene family in Phalaenopsis equestris
Source: PeerJ. 2024 Sep 25;12:e18073. doi: 10.7717/peerj.18073 (PMC11438434; doi:10.7717/peerj.18073)
Supplement: Supplemental Information 6 [file peerj-12-18073-s006.xlsx]

## Sheet: Sheet1
Table S4 Putative members of PeIDD gene family in P.equestris
Putative PeIDD Name	Location	Protein Length/aa	MW	pI	Instability index	Aliphatic index	GRAVY
PeIDD1	NW_018164444.1:22,304,350 - 22,307,200	480	50799.2	8.97	56.09	62.15	-0.444
PeIDD2	NW_018164512.1:36,890 - 39,472	421	46424.4	9.08	46.28	65.82	-0.648
PeIDD3	NW_018164520.1:470,091 - 471,940	197	22098.3	9.56	89.71	58.98	-0.724
PeIDD4	NW_018164536.1:4,302,352 - 4,304,814	385	43148	9.24	49.92	62.84	-0.743
PeIDD5	NW_018164616.1:134,273 - 136,511	358	40150	9.42	82.77	67.35	-0.655
PeIDD6	NW_018164665.1:1,527,999 - 1,533,100	326	35685.8	9.14	52.18	60.89	-0.475
PeIDD7	NW_018164668.1:1,291,007 - 1,299,149	266	28942.9	9.47	46.54	63.53	-0.563
PeIDD8	NW_018164739.1:2,782,096 - 2,784,364	454	50016.3	9.01	37.79	56.1	-0.646
PeIDD9	NW_018165040.1:1,838,783 - 1,842,503	408	45644.5	9.05	55.25	63.63	-0.7
PeIDD10	NW_018165512.1:287,323 - 290,079	406	45294	8.71	57.4	69.21	-0.589
