# Supplementary material for: Genome-wide identification, expression pattern and interacting protein analysis of INDETERMINATE DOMAIN (IDD) gene family in Phalaenopsis equestris
Source: PeerJ. 2024 Sep 25;12:e18073. doi: 10.7717/peerj.18073 (PMC11438434; doi:10.7717/peerj.18073)
Supplement: Supplemental Information 7 [file peerj-12-18073-s007.xlsx]

## Sheet: Sheet1
Table S5 Promoter sequences of PeIDD genes
Putative PeIDD Name	promoter sequences
PeIDD1	tgttgttcgttttcagctcgttaacttagcgaacgagtcgaacacgagtttttttaacgagccgaacaagagttgtttgcaaacaacgagccgttttgacaggccgaatcacgaaaggtcatatatacttttgtttttattaaatgtgtaagatagtaaatatttgtttttagtgggcacaaattaataattttaaagataatcaaaatatttttttatccaaatttgggtttgacattgatgatttttacttttttattatatttttaaaaaaaaaattattagaaatatgctgataaaaattaaatgtaaaaaaagaataggacttgaaatagttgtataatcattttattagattgaaattaccttatttcttttaaattcaatgtgcttgaattt…
PeIDD2	gtcactctagttttttaaaaaatattttttttctgcagtaattttacagttgtttctttaaacaggtgcagccgcctcaaacgaacctgtaagccgtatgtaaaaatagttttgaaattgcggcgtgaattttttttaggaactgtttcttgtatacatgtatttagttttcaaaaaaattatatcaaattttcattcttcaatgctagaatatgtagtacattagttaaaaataaaatgacaattttcattctatttattttgatatttattggataatttgctgataagttgattaaaaataatctgttgataagctatgtgcggtagctattacaaatttttattatttttttttaaaaagtcagatcgctgtcaaaaagttgtcaccgcacctag…
PeIDD3	accacttttttttattttgagtgttaggttgtattgtgagtgatcaccaaaccacagcaccgaattatcactactcccttccccttccaaccacccctccgccgccgatctccacctctccatcgctcctccgccgccgccggctgcaaacgctacagtggcggatttagaaagagaagaggtaagggtgcaagttcagatagcggagagagaactagctgcggctcgtataataaggcagcaagcgcaagctgagctccaaaaggcctgcgcgcttcgaaccgccgccgcacgacagatcaattctgttctgcttcacattacttgtggggactgccggcagagaattgggataaagtgtgtcagactcgccggccgtgatgatggtggtggtgatga…
PeIDD4	atatatatataggtggggaaatggtatggatgcttcctatttctttttgaaacaaagagttgatatttggtttaatttttatatcttttcagtccttttttttttctttgtttaggagggaaattaaagctggttcctttcaattcatacccatcacttattttgtttgaagaagaatcgattaaaagtggctacaaaaacaacatatttgggttctagtttaataaatatataattttaatgttgtatgtttgacttttaagttctatttctgaatcattttcttttttttttttagttgattcgcttttcaatctgttcttagatgattaatggatgcttttgttgtttaattacttggtaaggttagatgatacatgcatgttaaatgtttttcaa…
PeIDD5	taaaaattgaaagtgatgtgcttaatgtgaaattattacgtccgtttttcatccaacggcgatgatttgcctataagaaatgcacaataatctgtcaagacatcaccattgtccgaacatgcggttcatagacataataatccttgttaaagagcctgcttagattaactaaaacacattttgtattctattacatgtttatatccaaaattttcaatttgcatcagactatacatgaactcaactcgcataaatcttcatcaaacaaactttaattgatactttataaaaatgaatgatgactctcttcgaattcattaaatatagcagtaattaatacactttgtcaaaaatgtgttgaaatgagaaataaatcaacacagttttgttcaggaaaaa…
PeIDD6	aatgtaattttatctttattatgtaaaattagatattaaattataatcaacaataattttcaataaaattatttagatttttttattctttcaaatgtttctcaactcttctgcattcatatatttcacacctaaattgtgatttttacacttatatttctctatatataaaaagatgaatttctccaatgagcctgttatgtataggtgaagatggttaggaagtaagaattaaagtttggatgttagatatgtgttaaagtttggatgttagatatgtgttgagaaattagggcgaagaaaaacaaaaacgacacaaatctagaagaacacaaagatttaatgaggtttgacaaagatgcctacgtcctcgaaagcagagccgctttttcactaatc…
PeIDD7	tagctttgaaagttgttcttatatacttaattttagtcattgttttctcctaaatacttctatgttggtgagtctttcattgcaagaatttcttctttgctaattcccacaaagaagaaattgggttttttttttttttttttttttttttttaataattatttattttactttatttttgctaaacatgtcatacaactttattatttctgaagttatttatttatttatttatttattttggtggaatttcacttttcaatggtatttgtgttcattgtctcagagagtttgttaagaagatttaatattttttttaaaattatttatttttttgttccttagctttaagttttatcaataaatataagttctatatactggctgaatatattcttt…
PeIDD8	ccattaccaccaacattgataaagacaagataatcaaaactccacggagtattcaagataactcaaatctcctcaaattatgaatttttgaagagttaaaaattatgttcaatacaagttgtatatttttggacgacgcatagtatatcacctgagaatggggacaactgatgtgacatcaagaaatttatatcaaacacaaatctcgatgcatttttatagggatcttccaaattcaaattgacgatcatatgggctccgatctctgcaaatttatagtggaactgaccatctcaacaagacgaaaaaaataatgtaaaaattgattcaattcaggtccaatcaagcccagattaagctattgaagtataatcacaagctttggattgtcaattgaat…
PeIDD9	aaagatgacgataagagtttaaatatatttttctaattttatttttaataaaaattgaagctattactggtctataattttaataaaaactttttcatagtgaaatccataaatagtatatatatatatatatatatgtatatatatattggcattaaatttttttttattttttaaaaaatagaaatatgaaaaaatatatgatgaaaggctgcatggtctttttttgaatgattgagatagatgatatctcatccattttagaggtaaaaaactagctttaaggcttttgattgaatatatgtttttatctaataatttgtacttaattttgacactattgttaaaggagtgcaagttttatggtggaggttgaaggctgcctttgttaagttttat…
PeIDD10	atagataaccgaaaacgtatgatcgtcagttaatatttgcttatacttgatagtctaatgcattggtaagaatttaaaccatcgaaaaaataatacttttgataaacgacagtatgttctgtatttttgcctcgcaaataacccagatcataaattgtcattagaccatctgtaatagctaaaactgtcagaaaaaatagtacttttgataggtgagggcatgcccaatagttatatttttgtaaataactcaggtcataaactgtcgctagatcgtcagaaaatagaacattttttcttatgcaaatttagaccatcgaatttgccatccgttttagcacttttttactatagtggaagttaatatgatcaaattgaaggagacttcaactggcacgt…
