# Supplementary material for: Genome-wide identification, expression pattern and interacting protein analysis of INDETERMINATE DOMAIN (IDD) gene family in Phalaenopsis equestris
Source: PeerJ. 2024 Sep 25;12:e18073. doi: 10.7717/peerj.18073 (PMC11438434; doi:10.7717/peerj.18073)
Supplement: Supplemental Information 8 [file peerj-12-18073-s008.xlsx]

## Sheet: Sheet1
Table S6 The cis-element analysis of PeIDD genes
			PeIDD1	PeIDD2	PeIDD3	PeIDD4	PeIDD5	PeIDD6	PeIDD7	PeIDD8	PeIDD9	PeIDD10
development-related elements	LRE	AT1-motif				2			1		1
		GT1-motif	2		1	1			1		1	1
		G-box	1		3	1	1	2		2		1
		Box II						1
		Box 4	3	3	3	3	2	1		2	4	3
		AE-box						1	1
		GA-motif										1
		GATA-motif		1			2	1
		I-box	1	2	1		1				1	1
		MRE			4
		ATC-motif		2						1
		TCCC-motif					1		2	1		1
		TCT-motif	2	3	1	1		1	1
		ACE element		1
		CAG-motif								1
		AE-box					1					1
		LAMP-element								1	1
		chs-CMA2a	1
		chs-CMA2c	1	2
	SSE	RY-element				2					1
	MEE	CAT-box			3	1		2			1	2
	PEE	HD-Zip 1				1
	EEE	GCN4-motif						1
hormone-responsive elements	ABA	ABRE	3	1	1	2		2	1	2	2	2
	GA	P-box			1		1			2		1
		TATC-box			2				1
		GRAE-motif							2
	Auxin	TGA-element	1	2		1	1	1	2	2		1
		AuxRR-core		1	1		2			1
	SA	TCA-element		2	1		2	1	1		1	2
	MeJA	TGACG-motif		3	1	2		2		1	1	4
		CGTCA-motif		3	1	2		2		1	1	4
abiotic stress responsive elements	LTR	LTR		1	1				2	3	2	2
	DE	MBS			1	1	1	1	1	2		2
