# Supplementary material for: Genome-wide identification, expression pattern and interacting protein analysis of INDETERMINATE DOMAIN (IDD) gene family in Phalaenopsis equestris
Source: PeerJ. 2024 Sep 25;12:e18073. doi: 10.7717/peerj.18073 (PMC11438434; doi:10.7717/peerj.18073)
Supplement: Supplemental Information 9 [file peerj-12-18073-s009.xlsx]

## Sheet: Sheet1
Table S7 List of interaction proteins of PeIDDs
Nomenclatures	interaction proteins	Molecular functions		Values
PeIDD1	ZFP4	Zinc finger protein 4		0.611
PeIDD2	SPS5	Putative sucrose-phosphate synthase 5		0.279
	ERF021	Ethylene-responsive transcription factor ERF021		0.279
	DREB2C	Dehydration-responsive element-binding protein 2C		0.276
	DREB2E	Dehydration-responsive element-binding protein 2E		0.275
	BHLH104	Transcription factor bHLH104		0.262
PeIDD3	SWI3B	SWI/SNF complex subunit SWI3B		0.833
	SWI3C	SWI/SNF complex subunit SWI3C		0.77
	SWI3D	SWI/SNF complex subunit SWI3D		0.77
	PTI5	Pathogenesis-related genes transcriptional activator PTI5		0.472
PeIDD4	TINY	Ethylene-responsive transcription factor TINY		0.313
	DREB2C	Dehydration-responsive element-binding protein 2C		0.307
	DREB2F	Dehydration-responsive element-binding protein 2F		0.305
	ATL78	RING-H2 finger protein ATL78		0.304
	BEH4	BES1/BZR1 like protein 4		0.29
	WRKY24	Putative WRKY transcription factor 24		0.286
	ZFP4	Zinc finger protein 4		0.611
PeIDD5	SWI3B	SWI/SNF complex subunit SWI3B		0.833
	BRM	ATP-dependent helicase BRM		0.833
	PTI5	Pathogenesis-related genes transcriptional activator PTI5		0.472
PeIDD6	SCR	Protein SCARECROW; Belongs to the GRAS family.		0.97
	SHR	Protein short root; Belongs to the GRAS family.		0.905
	GAI	DELLA protein GAI; Belongs to the GRAS family.		0.779
	GAIP	DELLA protein GAIP; Belongs to the GRAS family.		0.779
PeIDD7	SCR	Protein SCARECROW; Belongs to the GRAS family.		0.97
	SHR	Protein short root; Belongs to the GRAS family.		0.905
	GAI	DELLA protein GAI; Belongs to the GRAS family.		0.779
	GAIP	DELLA protein GAIP; Belongs to the GRAS family.		0.779
PeIDD8	SMC3	Structural maintenance of chromosomes protein		0.317
PeIDD9	TINY	Ethylene-responsive transcription factor TINY		0.313
	DREB2C	Dehydration-responsive element-binding protein 2C		0.307
	DREB2F	Dehydration-responsive element-binding protein 2F		0.305
	ATL78	RING-H2 finger protein ATL78		0.304
	BEH4	BES1/BZR1 like protein 4		0.29
	WRKY24	Putative WRKY transcription factor 24		0.286
PeIDD10	SPS5	Putative sucrose-phosphate synthase 5		0.279
	ERF021	Ethylene-responsive transcription factor ERF021		0.279
	DREB2C	Dehydration-responsive element-binding protein 2C		0.276
	DREB2E	Dehydration-responsive element-binding protein 2E		0.275
	BHLH104	Transcription factor bHLH104		0.262
