# Supplementary material for: Genome-wide identification, expression pattern and interacting protein analysis of INDETERMINATE DOMAIN (IDD) gene family in Phalaenopsis equestris
Source: PeerJ. 2024 Sep 25;12:e18073. doi: 10.7717/peerj.18073 (PMC11438434; doi:10.7717/peerj.18073)
Supplement: Supplemental Information 11 [file peerj-12-18073-s011.xlsx]

## Sheet: Sheet1
tissue	gene	CT
flower	peactin	22.2791	peidd1	29.0655	6.78636	0.00905946	2.26486	peidd2	30.1601	7.88098	0.00424218	0.432875	peidd3	29.5253	7.24621	0.0065868	5.489	peidd4	27.1488	4.86966	0.0342048	0.356299	peidd5	27.2949	5.01578	0.0309101	14.05	peidd6	33.5174	11.2383	0.000413944	0.179976	peidd7	26.3636	4.08454	0.0589428	0.475345	peidd8	31.3418	9.0627	0.00187005	5.0542	peidd9	32.4282	10.1491	0.000880672	0.00346721	peidd10	Undetermined
flower	peactin	21.9983	peidd1	28.8304	6.83212	0.00877658	2.19415	peidd2	29.9508	7.95258	0.00403679	0.411917	peidd3	29.5229	7.5246	0.00543086	4.52572	peidd4	26.9776	4.97932	0.0317012	0.330221	peidd5	27.6049	5.60662	0.0205229	9.32857	peidd6	33.2862	11.288	0.000399928	0.173882	peidd7	26.3402	4.34189	0.0493128	0.397684	peidd8	30.9769	8.97861	0.0019823	5.35757	peidd9	31.9662	9.96792	0.000998522	0.00393119	peidd10
flower	peactin	21.8755	peidd1	29.1092	7.23364	0.0066444	1.6611	peidd2	29.3761	7.50053	0.00552226	0.563496	peidd3	29.543	7.66741	0.00491902	4.09918	peidd4	26.9358	5.06025	0.0299717	0.312206	peidd5	27.6239	5.74839	0.0186021	8.45549	peidd6	33.5206	11.645	0.000312243	0.135758	peidd7	26.3221	4.44654	0.0458626	0.36986	peidd8	30.8493	8.97379	0.00198893	5.3755	peidd9	32.3519	10.4764	0.000701945	0.00276356	peidd10
root	peactin	22.9312	peidd1	31.1922	8.26104	0.00325971	0.814928	peidd2	29.5126	6.58139	0.0104425	1.06556	peidd3	32.523	9.59184	0.00129589	1.07991	peidd4	26.3057	3.37453	0.0964199	1.00437	peidd5	31.6418	8.71062	0.00238694	1.08497	peidd6	31.5873	8.6561	0.00247887	1.07777	peidd7	25.8684	2.93724	0.130557	1.05288	peidd8	Undetermined				peidd9	24.7787	1.84752	0.277869	1.09397	peidd10	29.8306
root	peactin	22.8137	peidd1	31.0104	8.19666	0.00340847	0.852117	peidd2	29.5423	6.72862	0.0094294	0.962184	peidd3	32.6261	9.81236	0.00111221	0.926838	peidd4	26.2294	3.41566	0.0937093	0.976138	peidd5	31.8131	8.99941	0.00195392	0.888146	peidd6	31.5925	8.77882	0.00227673	0.989881	peidd7	25.8261	3.01238	0.123932	0.999449	peidd8					peidd9	24.7922	1.97851	0.253751	0.99902	peidd10	29.7502
root	peactin	23.0602	peidd1	30.6652	7.60509	0.00513619	1.28405	peidd2	29.6537	6.59358	0.0103547	1.0566	peidd3	32.7678	9.70762	0.00119596	0.99663	peidd4	26.2777	3.2175	0.107507	1.11986	peidd5	31.8311	8.77095	0.00228918	1.04054	peidd6	31.861	8.80087	0.00224221	0.974872	peidd7	26.1064	3.04622	0.121059	0.976283	peidd8					peidd9	25.0846	2.02445	0.245799	0.967712	peidd10	29.8314
shoot	peactin	23.3761	peidd1	30.0775	6.70139	0.00960908	2.40227	peidd2	30.6784	7.30231	0.00633558	0.646487	peidd3	30.2364	6.86022	0.0086073	7.17275	peidd4	27.0671	3.69096	0.07743	0.806562	peidd5	28.4423	5.06617	0.0298492	13.5678	peidd6	34.8467	11.4706	0.000352373	0.153206	peidd7	26.6919	3.31579	0.100427	0.809891	peidd8	32.3572	8.98105	0.00197895	5.3485	peidd9	27.6728	4.29664	0.0508841	0.200331	peidd10	Undetermined
shoot	peactin	23.1946	peidd1	30.1432	6.94857	0.00809604	2.02401	peidd2	30.5418	7.34725	0.00614125	0.626658	peidd3	30.1063	6.91175	0.00830534	6.92112	peidd4	26.9969	3.80229	0.0716799	0.746665	peidd5	28.0434	4.84883	0.0347022	15.7737	peidd6	34.5871	11.3925	0.000371969	0.161726	peidd7	26.7082	3.51364	0.0875565	0.706101	peidd8	32.3587	9.16405	0.00174319	4.71132	peidd9	27.0129	3.81828	0.0708896	0.279093	peidd10
shoot	peactin	22.9787	peidd1	29.8328	6.85407	0.00864409	2.16102	peidd2	30.4621	7.48336	0.00558834	0.570239	peidd3	30.08	7.10128	0.00728286	6.06905	peidd4	26.4341	3.45542	0.091162	0.949604	peidd5	28.3555	5.3768	0.024067	10.9396	peidd6	33.6544	10.6757	0.000611349	0.265804	peidd7	26.4936	3.51489	0.087481	0.705492	peidd8	32.167	9.18835	0.00171408	4.63264	peidd9	27.1516	4.17288	0.0554418	0.218275	peidd10
leaf	peactin	24.9596	peidd1	32.177	7.21748	0.00671928	1.67982	peidd2	31.9484	6.98885	0.00787311	0.803378	peidd3	32.8117	7.85218	0.0043277	3.60642	peidd4	28.2222	3.26264	0.104195	1.08537	peidd5	27.981	3.02147	0.123154	55.979	peidd6	33.2303	8.27072	0.00323792	1.40779	peidd7	27.2351	2.27555	0.206533	1.66559	peidd8	36.2961	11.3365	0.0003867	1.04514	peidd9	34.6639	9.70439	0.00119864	0.00471906	peidd10	Undetermined
leaf	peactin	24.934	peidd1	32.4837	7.54972	0.00533714	1.33429	peidd2	31.8443	6.91029	0.00831371	0.848338	peidd3	33.0255	8.09149	0.00366623	3.05519	peidd4	28.1287	3.19476	0.109215	1.13766	peidd5	27.8165	2.88248	0.135609	61.6404	peidd6	33.2335	8.29949	0.00317398	1.37999	peidd7	27.1396	2.20559	0.216796	1.74835	peidd8	36.3298	11.3958	0.000371115	1.00301	peidd9	34.9765	10.0425	0.000948217	0.00373314	peidd10	Undetermined
leaf	peactin	24.6471	peidd1	32.4599	7.81274	0.00444765	1.11191	peidd2	31.7194	7.0723	0.00743064	0.758229	peidd3	32.1881	7.54096	0.00536965	4.47471	peidd4	28.1794	3.5323	0.0864313	0.900326	peidd5	27.4917	2.84456	0.13922	63.2819	peidd6	33.123	8.47582	0.00280882	1.22123	peidd7	27.0591	2.41192	0.187905	1.51536	peidd8	36.5514	11.9042	0.000260897	0.705128	peidd9	34.1982	9.55107	0.00133303	0.00524817	peidd10	Undetermined
[truncated: 3 more columns]
