# Supplementary material for: Genome-wide identification, expression pattern and interacting protein analysis of INDETERMINATE DOMAIN (IDD) gene family in Phalaenopsis equestris
Source: PeerJ. 2024 Sep 25;12:e18073. doi: 10.7717/peerj.18073 (PMC11438434; doi:10.7717/peerj.18073)
Supplement: Supplemental Information 12 [file peerj-12-18073-s012.xlsx]

## Sheet: Sheet1
25℃-0H	PeACTIN	24.3482	PeIDD1	29.8249	5.4767	0.0224569	1.00602	PeIDD2	28.5456	4.19744	0.0545059	1.01921	PeIDD3	32.2253	7.87719	0.00425333	1.00078	PeIDD4	26.3071	1.95899	0.257208	0.999993	PeIDD5	30.6247	6.27657	0.0128992	0.99994	PeIDD6	33.7383	9.39018	0.0014903	0.955321	PeIDD7	32.5534	8.20527	0.00338819	0.626282	PeIDD8	34.9242	10.5761	0.000655057	0.935796	PeIDD9	33.6344	9.2862	0.00160168	1.00105	PeIDD10	33.1831
25℃-0H	PeACTIN	23.9393	PeIDD1	29.4246	5.48535	0.0223226	1	PeIDD2	28.1642	4.22489	0.0534787	1	PeIDD3	32.1339	8.19457	0.0034134	0.803154	PeIDD4	25.8426	1.90334	0.267323	1.03932	PeIDD5	30.2456	6.30635	0.0126357	0.979515	PeIDD6	33.2638	9.32455	0.00155966	0.999782	PeIDD7	31.2727	7.3334	0.00620049	1.14612	PeIDD8	34.4253	10.486	0.000697276	0.996109	PeIDD9	33.2594	9.32007	0.00156451	0.97782	PeIDD10	32.8412
25℃-0H	PeACTIN	24.7633	PeIDD1	30.2727	5.50947	0.0219525	0.983419	PeIDD2	28.8836	4.12037	0.0574971	1.07514	PeIDD3	32.6213	7.85798	0.00431035	1.0142	PeIDD4	26.7335	1.97026	0.255207	0.992212	PeIDD5	30.8325	6.06925	0.0148927	1.15447	PeIDD6	33.8334	9.07017	0.0018604	1.19256	PeIDD7	32.2924	7.52917	0.00541369	1.00068	PeIDD8	34.9374	10.1742	0.000865512	1.23645	PeIDD9	34.0213	9.25798	0.00163331	1.02082	PeIDD10	33.3454
25℃-1H	PeACTIN	24.5081	PeIDD1	29.9942	5.48608	0.0223113	0.999495	PeIDD2	28.3866	3.87846	0.0679937	1.27141	PeIDD3	32.5179	8.00973	0.00388	0.91294	PeIDD4	26.3243	1.81612	0.283984	1.10409	PeIDD5	30.1351	5.62699	0.0202351	1.56862	PeIDD6	33.6566	9.14842	0.00176218	1.12961	PeIDD7	32.2843	7.77619	0.00456177	0.84321	PeIDD8	35.1788	10.6706	0.000613515	0.87645	PeIDD9	33.8253	9.31714	0.00156769	0.979809	PeIDD10	33.2849
25℃-1H	PeACTIN	24.4302	PeIDD1	29.9606	5.53032	0.0216375	0.96931	PeIDD2	28.7571	4.32684	0.0498299	0.931749	PeIDD3	32.3308	7.90058	0.00418494	0.984693	PeIDD4	26.3521	1.92184	0.263917	1.02608	PeIDD5	30.6309	6.2007	0.0135958	1.05394	PeIDD6	33.6664	9.23619	0.00165817	1.06293	PeIDD7	32.3626	7.9324	0.00409364	0.756681	PeIDD8	35.7163	11.2861	0.000400456	0.572079	PeIDD9	33.6394	9.20914	0.00168956	1.05597	PeIDD10	32.7882
25℃-1H	PeACTIN	24.4038	PeIDD1	29.8737	5.46991	0.0225627	1.01076	PeIDD2	28.7896	4.38584	0.0478334	0.894417	PeIDD3	32.6097	8.20593	0.00338664	0.796857	PeIDD4	26.2669	1.86313	0.274879	1.06869	PeIDD5	29.8306	5.42679	0.0232473	1.80212	PeIDD6	33.4575	9.05365	0.00188183	1.2063	PeIDD7	32.3423	7.93854	0.00407625	0.753465	PeIDD8	35.3371	10.9333	0.000511401	0.730573	PeIDD9	33.889	9.48517	0.00139533	0.872083	PeIDD10	33.1151
25℃-5H	PeACTIN	23.4546	PeIDD1	29.2828	5.82817	0.0176013	0.788498	PeIDD2	27.3366	3.88198	0.0678277	1.26828	PeIDD3	31.7596	8.30494	0.00316201	0.744003	PeIDD4	25.3731	1.91846	0.264537	1.02848	PeIDD5	28.4613	5.00672	0.0311048	2.41122	PeIDD6	32.8323	9.37765	0.0015033	0.963656	PeIDD7	30.8424	7.38776	0.00597122	1.10374	PeIDD8	34.8714	11.4168	0.000365772	0.522531	PeIDD9	33.1427	9.68813	0.00121222	0.757637	PeIDD10	33.3871
25℃-5H	PeACTIN	23.3868	PeIDD1	29.5835	6.19669	0.0136336	0.610753	PeIDD2	27.2939	3.90704	0.06666	1.24645	PeIDD3	31.7231	8.33626	0.00309411	0.728026	PeIDD4	25.3674	1.98052	0.253398	0.985178	PeIDD5	28.8384	5.45154	0.0228519	1.77147	PeIDD6	32.8371	9.45028	0.00142949	0.916339	PeIDD7	30.5748	7.18795	0.00685821	1.26769	PeIDD8	34.4217	11.0349	0.000476617	0.680882	PeIDD9	33.1557	9.76888	0.00114624	0.7164	PeIDD10	33.5772
25℃-5H	PeACTIN	23.2199	PeIDD1	29.3111	6.09114	0.0146685	0.657114	PeIDD2	27.9233	4.70337	0.0383836	0.717719	PeIDD3	31.2021	7.98213	0.00395494	0.930575	PeIDD4	25.1464	1.92646	0.263074	1.0228	PeIDD5	28.7435	5.5236	0.0217386	1.68516	PeIDD6	32.6316	9.4117	0.00146824	0.941177	PeIDD7	30.8434	7.6235	0.00507106	0.937349	PeIDD8	34.5645	11.3445	0.00038455	0.549357	PeIDD9	33.2018	9.98183	0.000988939	0.618087	PeIDD10	33.4016
25℃-10H	PeACTIN	20.8045	PeIDD1	27.9021	7.09762	0.00730135	0.327083	PeIDD2	25.1253	4.32083	0.0500381	0.935641	PeIDD3	29.1009	8.29648	0.00318062	0.748381	PeIDD4	23.0239	2.21945	0.214723	0.834817	PeIDD5	26.132	5.32749	0.0249038	1.93053	PeIDD6	29.8262	9.02176	0.00192389	1.23326	PeIDD7	27.1222	6.31771	0.0125366	2.3173	PeIDD8	31.3472	10.5428	0.000670362	0.95766	PeIDD9	30.2157	9.41124	0.0014687	0.917939	PeIDD10	30.815
25℃-10H	PeACTIN	21.4237	PeIDD1	27.8187	6.39498	0.0118828	0.532322	PeIDD2	25.0616	3.63791	0.0803304	1.50206	PeIDD3	29.8287	8.40497	0.00295019	0.694164	PeIDD4	23.5065	2.08278	0.236059	0.917769	PeIDD5	26.8636	5.43995	0.0230363	1.78576	PeIDD6	30.5626	9.13886	0.0017739	1.13711	PeIDD7	27.5839	6.16021	0.0139827	2.58461	PeIDD8	31.8713	10.4476	0.00071608	1.02297	PeIDD9	30.8356	9.41195	0.00146798	0.917487	PeIDD10	31.1122
25℃-10H	PeACTIN	21.0431	PeIDD1	27.6164	6.57327	0.0105015	0.470441	PeIDD2	25.2195	4.17642	0.0553059	1.03414	PeIDD3	29.1058	8.06273	0.00374005	0.880013	PeIDD4	23.1516	2.1085	0.231888	0.901553	PeIDD5	26.5237	5.48063	0.0223958	1.73611	PeIDD6	30.018	8.97493	0.00198737	1.27395	PeIDD7	27.4355	6.39237	0.0119043	2.20043	PeIDD8	31.4143	10.3712	0.000755014	1.07859	PeIDD9	30.2472	9.20407	0.00169551	1.05969	PeIDD10	30.617
6BA-0H	PeACTIN	24.3482	PeIDD1	29.9249	5.5767	0.020953	0.938646	PeIDD2	28.3355	3.98739	0.0630486	1.17892	PeIDD3	32.3244	7.97622	0.00397117	0.934392	PeIDD4	26.2372	1.88909	0.269977	1.04963	PeIDD5	30.6548	6.3066	0.0126335	0.979341	PeIDD6	33.7383	9.39018	0.0014903	0.955321	PeIDD7	31.8135	7.46532	0.00565868	1.04597	PeIDD8	34.7536	10.4054	0.000737323	1.05332	PeIDD9	33.7142	9.366	0.00151549	0.94718	PeIDD10	33.1949
6BA-0H	PeACTIN	23.9393	PeIDD1	29.4637	5.52438	0.0217268	0.973309	PeIDD2	28.1642	4.22489	0.0534787	0.999977	PeIDD3	32.1363	8.19706	0.00340752	0.801769	PeIDD4	26.0425	2.10324	0.232735	0.904844	PeIDD5	30.2456	6.30631	0.0126361	0.979542	PeIDD6	33.2393	9.30005	0.00158637	1.0169	PeIDD7	32.6777	8.73841	0.00234141	0.432793	PeIDD8	34.2377	10.2984	0.000794072	1.13439	PeIDD9	33.1893	9.25002	0.00164235	1.02647	PeIDD10	32.7273
6BA-0H	PeACTIN	24.7633	PeIDD1	30.1727	5.40947	0.0235281	1.054	PeIDD2	28.7836	4.02037	0.0616237	1.15228	PeIDD3	32.5235	7.76018	0.00461268	1.08534	PeIDD4	26.8635	2.10026	0.233216	0.906714	PeIDD5	30.8356	6.07232	0.014861	1.15202	PeIDD6	33.8774	9.11417	0.00180452	1.15674	PeIDD7	32.1525	7.38919	0.00596529	1.10264	PeIDD8	34.9247	10.1614	0.0008732	1.24743	PeIDD9	34.1143	9.35098	0.00153135	0.957094	PeIDD10	33.5264
6BA-1H	PeACTIN	21.9781	PeIDD1	28.3118	6.33373	0.0123981	0.555407	PeIDD2	26.0062	4.02814	0.0612929	1.14609	PeIDD3	29.4404	7.46229	0.00567056	1.33425	PeIDD4	25.4093	3.43121	0.092705	0.360425	PeIDD5	25.7073	3.72923	0.0754033	5.84522	PeIDD6	29.82	7.84191	0.00435862	2.79399	PeIDD7	27.6018	5.62373	0.020281	3.7488	PeIDD8	32.9222	10.9442	0.000507544	0.725063	PeIDD9	34.227	12.2489	0.000205452	0.128408	PeIDD10	32.3212
6BA-1H	PeACTIN	21.5933	PeIDD1	28.1768	6.5835	0.0104273	0.467117	PeIDD2	26.0117	4.41843	0.046765	0.874438	PeIDD3	29.048	7.45472	0.00570039	1.34127	PeIDD4	25.3908	3.79752	0.0719172	0.279605	PeIDD5	25.2519	3.65868	0.0791824	6.13817	PeIDD6	29.7819	8.18862	0.00342752	2.19713	PeIDD7	27.6155	6.02226	0.0153857	2.84394	PeIDD8	32.216	10.6227	0.000634228	0.90604	PeIDD9	34.4529	12.8597	0.00013454	0.0840878	PeIDD10	32.5799
6BA-1H	PeACTIN	21.051	PeIDD1	28.8338	7.7828	0.00454093	0.203423	PeIDD2	26.0283	4.97731	0.0317453	0.593592	PeIDD3	28.8158	7.76479	0.00459798	1.08188	PeIDD4	25.5546	4.50359	0.0440844	0.171395	PeIDD5	25.3535	4.30252	0.0506772	3.92847	PeIDD6	29.1483	8.09733	0.00365141	2.34065	PeIDD7	27.4483	6.39732	0.0118635	2.19289	PeIDD8	32.2583	11.2073	0.000422918	0.604169	PeIDD9	34.3209	13.2699	0.000101239	0.0632746	PeIDD10	32.1613
6BA-5H	PeACTIN	26.0918	PeIDD1	29.9119	3.82009	0.070801	3.17172	PeIDD2	28.6555	2.56365	0.169147	3.16281	PeIDD3	34.3218	8.23003	0.00333053	0.783653	PeIDD4	26.3157	0.223901	0.856247	3.32898	PeIDD5	30.8138	4.72202	0.0378906	2.93725	PeIDD6	Undetermined	#VALUE!	#VALUE!	#VALUE!	PeIDD7	32.1382	6.04636	0.0151308	2.79683	PeIDD8	34.5895	8.49766	0.00276662	3.95231	PeIDD9	34.6742	8.58237	0.00260886	1.63054	PeIDD10	Undetermined
6BA-5H	PeACTIN	26.2192	PeIDD1	29.7723	3.55314	0.0851919	3.8164	PeIDD2	28.6468	2.42761	0.185874	3.47557	PeIDD3	34.5031	8.28386	0.00320857	0.754957	PeIDD4	26.4121	0.192934	0.874825	3.40121	PeIDD5	30.7593	4.54008	0.0429833	3.33204	PeIDD6	Undetermined	#VALUE!	#VALUE!	#VALUE!	PeIDD7	32.0103	5.79112	0.0180592	3.33811	PeIDD8	34.8867	8.66751	0.00245935	3.51336	PeIDD9	34.7221	8.50294	0.00275651	1.72282	PeIDD10	Undetermined
6BA-5H	PeACTIN	25.6893	PeIDD1	29.4088	3.71947	0.075915	3.40082	PeIDD2	28.2797	2.59039	0.166041	3.10472	PeIDD3	34.1333	8.44395	0.00287156	0.675661	PeIDD4	26.1043	0.414984	0.750028	2.91601	PeIDD5	31.1044	5.41505	0.0234373	1.81684	PeIDD6	Undetermined	#VALUE!	#VALUE!	#VALUE!	PeIDD7	32.614	6.92468	0.0082312	1.52148	PeIDD8	34.3636	8.67427	0.00244784	3.49692	PeIDD9	34.3222	8.63288	0.00251909	1.57443	PeIDD10	Undetermined
6BA-10H	PeACTIN	23.0936	PeIDD1	28.3384	5.24479	0.026373	1.18145	PeIDD2	25.7714	2.67773	0.156287	2.92234	PeIDD3	31.6668	8.57311	0.00262565	0.6178	PeIDD4	24.8242	1.73055	0.301336	1.17156	PeIDD5	26.8546	3.76098	0.0737619	5.71798	PeIDD6	33.292	10.1984	0.000851095	0.545574	PeIDD7	28.2835	5.18989	0.0273961	5.06397	PeIDD8	33.3785	10.2849	0.000801576	1.14511	PeIDD9	34.1926	11.099	0.0004559	0.284938	PeIDD10	33.8624
6BA-10H	PeACTIN	23.1767	PeIDD1	28.7693	5.5925	0.0207247	0.928419	PeIDD2	25.7634	2.58665	0.166472	3.11279	PeIDD3	32.8426	9.66585	0.00123109	0.289669	PeIDD4	24.98	1.80323	0.286533	1.114	PeIDD5	26.9016	3.72485	0.0756323	5.86297	PeIDD6	33.7622	10.5854	0.000650826	0.417196	PeIDD7	28.0606	4.88386	0.0338696	6.26056	PeIDD8	33.1517	9.97493	0.000993682	1.41955	PeIDD9	33.9962	10.8195	0.000553371	0.345857	PeIDD10	33.2829
6BA-10H	PeACTIN	22.8065	PeIDD1	28.4328	5.62636	0.020244	0.906883	PeIDD2	25.6326	2.8261	0.141013	2.63675	PeIDD3	32.6735	9.86703	0.00107085	0.251965	PeIDD4	24.7748	1.9683	0.255554	0.993562	PeIDD5	26.9435	4.13706	0.0568356	4.40586	PeIDD6	33.5741	10.7676	0.000573639	0.367717	PeIDD7	27.3132	4.50675	0.0439878	8.13083	PeIDD8	32.6849	9.87838	0.00106246	1.5178	PeIDD9	34.3966	11.5901	0.000324355	0.202722	PeIDD10	32.3452
NAA-0H	PeACTIN	24.3482	PeIDD1	29.8548	5.50667	0.0219952	0.985333	PeIDD2	28.3456	3.99744	0.0626109	1.17073	PeIDD3	32.4273	8.07918	0.00369763	0.870031	PeIDD4	26.2442	1.89609	0.26867	1.04456	PeIDD5	30.6448	6.29663	0.0127211	0.986132	PeIDD6	33.7884	9.44021	0.0014395	0.92276	PeIDD7	31.8135	7.46532	0.00565868	1.04597	PeIDD8	34.8643	10.5161	0.000682865	0.975521	PeIDD9	33.6905	9.3423	0.00154059	0.96287	PeIDD10	32.7991
NAA-0H	PeACTIN	23.9393	PeIDD1	29.4546	5.51534	0.0218634	0.979427	PeIDD2	28.7642	4.82489	0.0352828	0.659738	PeIDD3	31.9368	7.99756	0.00391285	0.920671	PeIDD4	26.0526	2.11329	0.231119	0.898562	PeIDD5	30.2457	6.30641	0.0126352	0.979474	PeIDD6	33.2698	9.33055	0.00155319	0.995632	PeIDD7	32.6777	8.73841	0.00234141	0.432793	PeIDD8	34.4454	10.5061	0.000687605	0.982293	PeIDD9	33.1914	9.2521	0.00163999	1.02499	PeIDD10	32.8274
NAA-0H	PeACTIN	24.7633	PeIDD1	30.2727	5.50947	0.0219525	0.983419	PeIDD2	28.8836	4.12037	0.0574971	1.07511	PeIDD3	32.7235	7.96018	0.00401556	0.944838	PeIDD4	26.7535	1.99024	0.251697	0.978565	PeIDD5	30.8306	6.06732	0.0149126	1.15602	PeIDD6	33.8834	9.12017	0.00179703	1.15194	PeIDD7	32.1525	7.38919	0.00596529	1.10264	PeIDD8	34.8576	10.0943	0.000914773	1.30682	PeIDD9	34.2133	9.44998	0.00142979	0.89362	PeIDD10	33.6456
NAA-1H	PeACTIN	21.2153	PeIDD1	28.16	6.94467	0.00811793	0.363664	PeIDD2	24.2546	3.03932	0.121639	2.27448	PeIDD3	28.8093	7.59402	0.00517575	1.21782	PeIDD4	25.3076	4.09231	0.0586261	0.227931	PeIDD5	23.2555	2.04021	0.243129	18.8472	PeIDD6	28.7465	7.5312	0.0054061	3.46545	PeIDD7	26.7377	5.52235	0.0217574	4.0217	PeIDD8	31.8374	10.6221	0.000634503	0.906433	PeIDD9	34.4758	13.2604	0.000101909	0.0636928	PeIDD10	29.2439
NAA-1H	PeACTIN	21.4837	PeIDD1	28.7127	7.22902	0.00666571	0.298608	PeIDD2	24.4813	2.99766	0.125203	2.34112	PeIDD3	29.531	8.04737	0.00378006	0.889426	PeIDD4	25.3075	3.82384	0.0706171	0.27455	PeIDD5	23.5268	2.04314	0.242635	18.8089	PeIDD6	29.1116	7.6279	0.00505561	3.24078	PeIDD7	26.7211	5.23746	0.0265075	4.89972	PeIDD8	32.8043	11.3206	0.000390972	0.558532	PeIDD9	35.3747	13.8911	6.58226e-05	0.0411391	PeIDD10	29.3709
NAA-1H	PeACTIN	21.5465	PeIDD1	28.6434	7.0969	0.007305	0.327247	PeIDD2	24.3416	2.79517	0.144069	2.69388	PeIDD3	29.2918	7.74533	0.00466042	1.09657	PeIDD4	25.3133	3.76687	0.0734616	0.285609	PeIDD5	23.446	1.89959	0.26802	20.7767	PeIDD6	28.8943	7.34785	0.00613872	3.93508	PeIDD7	26.8807	5.33422	0.024788	4.58188	PeIDD8	31.8502	10.3037	0.000791166	1.13024	PeIDD9	33.0729	11.5265	0.00033899	0.211869	PeIDD10	29.5125
NAA-5H	PeACTIN	24.7952	PeIDD1	30.6476	5.85244	0.0173077	0.775344	PeIDD2	28.7855	3.99032	0.0629208	1.17653	PeIDD3	32.8686	8.0734	0.00371249	0.873526	PeIDD4	27.208	2.41283	0.187787	0.730093	PeIDD5	28.9355	4.14032	0.0567074	4.39593	PeIDD6	35.3124	10.5172	0.000682334	0.437393	PeIDD7	32.5806	7.78542	0.00453267	0.837832	PeIDD8	33.3727	8.57748	0.00261771	3.73958	PeIDD9	35.3295	10.5343	0.000674325	0.421453	PeIDD10	34.64
NAA-5H	PeACTIN	24.5285	PeIDD1	30.372	5.84349	0.0174154	0.780171	PeIDD2	29.3804	4.85192	0.0346278	0.647491	PeIDD3	33.1437	8.61515	0.00255023	0.600055	PeIDD4	27.1693	2.6408	0.160339	0.62338	PeIDD5	29.0747	4.54616	0.0428025	3.31802	PeIDD6	34.9629	10.4344	0.000722666	0.463248	PeIDD7	31.4391	6.91055	0.00831224	1.53646	PeIDD8	33.1332	8.60473	0.00256873	3.66962	PeIDD9	36.3195	11.791	0.000282207	0.176379	PeIDD10	34.1287
NAA-5H	PeACTIN	24.4302	PeIDD1	30.9186	6.48832	0.0111383	0.498972	PeIDD2	28.4107	3.98043	0.0633536	1.18462	PeIDD3	32.7989	8.36867	0.00302538	0.711853	PeIDD4	27.6282	3.19795	0.108974	0.423675	PeIDD5	28.9135	4.48327	0.0447097	3.46587	PeIDD6	35.1239	10.6937	0.000603783	0.38704	PeIDD7	31.8117	7.38144	0.00599742	1.10858	PeIDD8	32.9881	8.55789	0.0026535	3.79072	PeIDD9	35.9091	11.4788	0.000350374	0.218984	PeIDD10	33.6252
NAA-10H	PeACTIN	25.1607	PeIDD1	32.9855	7.82485	0.00441048	0.197579	PeIDD2	27.9784	2.81769	0.141837	2.65215	PeIDD3	32.8234	7.66279	0.00493482	1.16113	PeIDD4	28.9893	3.82859	0.0703848	0.273647	PeIDD5	27.2592	2.09849	0.233502	18.101	PeIDD6	34.993	9.83237	0.00109689	0.703132	PeIDD7	29.0234	3.86277	0.0687371	12.7056	PeIDD8	34.3668	9.20618	0.00169302	2.4186	PeIDD9	36.2494	11.0887	0.000459163	0.286977	PeIDD10	34.0654
NAA-10H	PeACTIN	25.2145	PeIDD1	32.2493	7.03479	0.00762634	0.341642	PeIDD2	27.7027	2.48821	0.178227	3.3326	PeIDD3	32.6744	7.45997	0.00567969	1.3364	PeIDD4	28.5909	3.37644	0.0962923	0.374372	PeIDD5	27.3214	2.10695	0.232137	17.9952	PeIDD6	34.9126	9.69812	0.00120386	0.771705	PeIDD7	29.3949	4.18045	0.0551516	10.1944	PeIDD8	33.9679	8.75343	0.00231716	3.31023	PeIDD9	37.2696	12.0551	0.000234995	0.146872	PeIDD10	33.7815
NAA-10H	PeACTIN	25.3084	PeIDD1	31.5623	6.25395	0.0131031	0.586988	PeIDD2	27.8902	2.58181	0.167031	3.12324	PeIDD3	32.7669	7.45859	0.00568513	1.33768	PeIDD4	28.7982	3.48981	0.0890152	0.34608	PeIDD5	27.3314	2.02304	0.24604	19.0729	PeIDD6	34.7149	9.40654	0.0014735	0.944552	PeIDD7	29.2808	3.97243	0.0637061	11.7756	PeIDD8	34.2643	8.95598	0.00201363	2.87662	PeIDD9	38.0495	12.7412	0.000146057	0.0912859	PeIDD10	33.9623
[truncated: 3 more columns]
