# Supplementary material for: Genome-wide identification, expression pattern and interacting protein analysis of INDETERMINATE DOMAIN (IDD) gene family in Phalaenopsis equestris
Source: PeerJ. 2024 Sep 25;12:e18073. doi: 10.7717/peerj.18073 (PMC11438434; doi:10.7717/peerj.18073)
Supplement: Supplemental Information 13 [file peerj-12-18073-s013.xlsx]

## Sheet: Sheet1
25-0H	PEACTIN	24.348	PeIDD1	29.865	5.5167	0.0218428	1.00013	PeIDD2	28.346	3.99744	0.0626109	1.08889	PeIDD3	32.227	7.87922	0.00424735	0.999376	PeIDD4	26.207	1.85909	0.275649	1.10282	PeIDD5	30.645	6.29663	0.0127211	1.00009	PeIDD6	33.788	9.44021	0.0014395	0.928713	PeIDD7	31.813	7.46532	0.00565868	0.999767	PeIDD8	35.834	11.4861	0.000348607	0.830017	PeIDD9	33.684	9.3363	0.00154701	0.99807	PeIDD10	32.824
25-0H	PEACTIN	23.939	PeIDD1	29.465	5.52538	0.0217117	0.994127	PeIDD2	28.764	4.82489	0.0352828	0.613614	PeIDD3	32.137	8.19756	0.00340634	0.801491	PeIDD4	26.043	2.10324	0.232735	0.931126	PeIDD5	30.246	6.30641	0.0126352	0.993334	PeIDD6	33.27	9.33055	0.00155319	1.00206	PeIDD7	32.678	8.73841	0.00234141	0.413677	PeIDD8	35.525	11.5859	0.000325302	0.774529	PeIDD9	33.269	9.3301	0.00155367	1.00237	PeIDD10	33.267
25-0H	PEACTIN	24.763	PeIDD1	30.073	5.30947	0.0252168	1.15461	PeIDD2	28.884	4.12037	0.0574971	0.999949	PeIDD3	32.624	7.86048	0.00430289	1.01244	PeIDD4	26.764	2.00026	0.249955	1.00002	PeIDD5	30.831	6.06732	0.0149126	1.17238	PeIDD6	33.883	9.12017	0.00179703	1.15937	PeIDD7	32.152	7.38919	0.00596529	1.05394	PeIDD8	35.977	11.2142	0.00042091	1.00217	PeIDD9	34.01	9.24698	0.00164581	1.06182	PeIDD10	33.345
25-1H	PEACTIN	24.508	PeIDD1	29.994	5.48608	0.0223113	1.02158	PeIDD2	28.387	3.878	0.068	1.18261	PeIDD3	32.518	8.01	0.004	0.941176	PeIDD4	26.637	2.129	0.229	0.916183	PeIDD5	30.145	5.637	0.02	1.57233	PeIDD6	33.687	9.179	0.0017	1.09677	PeIDD7	32.281	7.773	0.005	0.883392	PeIDD8	35.168	10.659	0.00062	1.47619	PeIDD9	33.885	9.377	0.0015	0.967742	PeIDD10	33.195
25-1H	PEACTIN	24.43	PeIDD1	29.961	5.53032	0.0216375	0.990729	PeIDD2	28.757	4.327	0.05	0.869565	PeIDD3	32.331	7.901	0.004	0.941176	PeIDD4	26.362	1.932	0.262	1.04821	PeIDD5	30.661	6.231	0.013	1.02201	PeIDD6	33.866	9.436	0.0014	0.903226	PeIDD7	32.373	7.942	0.004	0.706714	PeIDD8	35.716	11.285	0.0004	0.952381	PeIDD9	33.669	9.239	0.0017	1.09677	PeIDD10	32.842
25-1H	PEACTIN	24.404	PeIDD1	29.874	5.46991	0.0225627	1.03309	PeIDD2	28.79	4.386	0.048	0.834783	PeIDD3	32.61	8.206	0.003	0.705882	PeIDD4	26.264	1.86	0.275	1.10022	PeIDD5	29.841	5.437	0.023	1.80818	PeIDD6	33.447	9.044	0.0019	1.22581	PeIDD7	32.322	7.919	0.004	0.706714	PeIDD8	35.327	10.923	0.00051	1.21429	PeIDD9	34.118	9.714	0.0012	0.774194	PeIDD10	33.145
25-5H	PEACTIN	23.455	PeIDD1	29.283	5.82817	0.0176013	0.805921	PeIDD2	27.337	3.882	0.068	1.18261	PeIDD3	31.76	8.305	0.003	0.705882	PeIDD4	25.383	1.928	0.263	1.05221	PeIDD5	28.461	5.007	0.031	2.43711	PeIDD6	32.832	9.378	0.0015	0.967742	PeIDD7	30.943	7.489	0.006	1.06007	PeIDD8	34.869	11.415	0.00037	0.880952	PeIDD9	33.153	9.698	0.0012	0.774194	PeIDD10	34.379
25-5H	PEACTIN	23.387	PeIDD1	29.584	6.19669	0.0136336	0.624248	PeIDD2	27.294	3.907	0.067	1.16522	PeIDD3	31.723	8.336	0.003	0.705882	PeIDD4	25.488	2.102	0.233	0.932186	PeIDD5	28.888	5.502	0.022	1.72956	PeIDD6	32.931	9.544	0.0013	0.83871	PeIDD7	30.545	7.158	0.007	1.23675	PeIDD8	34.412	11.025	0.00048	1.14286	PeIDD9	33.183	9.796	0.0011	0.709677	PeIDD10	34.567
25-5H	PEACTIN	23.22	PeIDD1	29.311	6.09114	0.0146685	0.671635	PeIDD2	27.923	4.703	0.038	0.66087	PeIDD3	31.202	7.982	0.004	0.941176	PeIDD4	25.147	1.927	0.263	1.05221	PeIDD5	28.747	5.527	0.022	1.72956	PeIDD6	32.732	9.512	0.0014	0.903226	PeIDD7	30.845	7.625	0.005	0.883392	PeIDD8	34.554	11.335	0.00039	0.928571	PeIDD9	33.192	9.972	0.001	0.645161	PeIDD10	34.696
25-10H	PEACTIN	20.804	PeIDD1	27.902	7.09762	0.00730135	0.334311	PeIDD2	25.125	4.321	0.05	0.869565	PeIDD3	29.101	8.296	0.003	0.705882	PeIDD4	23.084	2.279	0.206	0.824165	PeIDD5	26.172	5.367	0.024	1.88679	PeIDD6	29.897	9.092	0.0018	1.16129	PeIDD7	27.13	6.326	0.012	2.12014	PeIDD8	31.337	10.533	0.0007	1.66667	PeIDD9	30.236	9.431	0.0014	0.903226	PeIDD10	31.145
25-10H	PEACTIN	21.424	PeIDD1	27.819	6.39498	0.0118828	0.544085	PeIDD2	25.062	3.638	0.08	1.3913	PeIDD3	29.829	8.405	0.003	0.705882	PeIDD4	23.706	2.282	0.206	0.824165	PeIDD5	26.833	5.409	0.024	1.88679	PeIDD6	30.766	9.342	0.0015	0.967742	PeIDD7	27.633	6.209	0.014	2.4735	PeIDD8	31.861	10.437	0.0007	1.66667	PeIDD9	30.846	9.422	0.0015	0.967742	PeIDD10	31.103
25-10H	PEACTIN	21.043	PeIDD1	27.616	6.57327	0.0105015	0.480836	PeIDD2	25.22	4.176	0.055	0.956522	PeIDD3	29.106	8.063	0.004	0.941176	PeIDD4	23.112	2.069	0.238	0.95219	PeIDD5	26.526	5.483	0.022	1.72956	PeIDD6	30.008	8.965	0.002	1.29032	PeIDD7	27.335	6.292	0.013	2.29682	PeIDD8	31.403	10.36	0.0008	1.90476	PeIDD9	30.247	9.204	0.0017	1.09677	PeIDD10	30.629
PEG-0H	PEACTIN	24.235	PeIDD1	29.765	5.5297	0.0216469	0.991158	PeIDD2	28.749	4.51343	0.0437846	0.761471	PeIDD3	32.187	7.95222	0.00403779	0.950068	PeIDD4	26.247	2.01209	0.247914	0.991853	PeIDD5	30.445	6.20969	0.0135113	1.06221	PeIDD6	33.683	9.44819	0.00143157	0.923592	PeIDD7	32.218	7.98329	0.00395177	0.698192	PeIDD8	35.234	10.9991	0.000488593	1.16332	PeIDD9	33.286	9.0513	0.00188489	1.21606	PeIDD10	33.026
PEG-0H	PEACTIN	23.38	PeIDD1	28.765	5.38479	0.0239342	1.09589	PeIDD2	27.656	4.27629	0.051607	0.897512	PeIDD3	31.636	8.25657	0.00326982	0.769369	PeIDD4	25.344	1.96366	0.256377	1.02571	PeIDD5	29.846	6.46571	0.0113143	0.88949	PeIDD6	32.66	9.27975	0.00160885	1.03797	PeIDD7	31.158	7.7778	0.00455667	0.805066	PeIDD8	34.225	10.8454	0.000543523	1.2941	PeIDD9	32.869	9.4895	0.00139116	0.897519	PeIDD10	32.164
PEG-0H	PEACTIN	23.753	PeIDD1	29.273	5.51947	0.0218009	0.998208	PeIDD2	27.893	4.14017	0.0567132	0.986316	PeIDD3	31.447	7.69349	0.00483091	1.13669	PeIDD4	25.863	2.11018	0.231618	0.926659	PeIDD5	30.14	6.38632	0.0119544	0.939808	PeIDD6	32.944	9.19029	0.00171178	1.10437	PeIDD7	31.652	7.89917	0.00418902	0.74011	PeIDD8	35.272	11.5192	0.000340713	0.811221	PeIDD9	33.014	9.26098	0.00162992	1.05156	PeIDD10	32.245
PEG1H	PEACTIN	22.256	PeIDD1	28.778	6.52148	0.0108852	0.498409	PeIDD2	26.663	4.407	0.047	0.817391	PeIDD3	30.841	8.685	0.002	0.470588	PeIDD4	26.928	4.672	0.039	0.156031	PeIDD5	27.798	5.541	0.021	1.65094	PeIDD6	31.613	9.357	0.0015	0.967742	PeIDD7	28.528	6.272	0.013	2.29682	PeIDD8	33.181	10.925	0.0005	1.19048	PeIDD9	31.989	9.733	0.0012	0.774194	PeIDD10	31.799
PEG1H	PEACTIN	21.978	PeIDD1	29.059	7.08141	0.00738388	0.33809	PeIDD2	26.252	4.274	0.052	0.904348	PeIDD3	30.831	8.854	0.002	0.470588	PeIDD4	26.893	4.915	0.033	0.132026	PeIDD5	27.181	5.204	0.027	2.12264	PeIDD6	31.195	9.218	0.0017	1.09677	PeIDD7	27.995	6.017	0.015	2.65018	PeIDD8	33.193	11.216	0.0004	0.952381	PeIDD9	31.439	9.462	0.0014	0.903226	PeIDD10	31.653
PEG1H	PEACTIN	21.787	PeIDD1	29.221	7.43386	0.00578343	0.264809	PeIDD2	26.225	4.438	0.046	0.8	PeIDD3	30.692	8.905	0.002	0.470588	PeIDD4	26.675	4.889	0.034	0.136027	PeIDD5	27.246	5.459	0.023	1.80818	PeIDD6	31.371	9.584	0.0013	0.83871	PeIDD7	27.936	6.149	0.014	2.4735	PeIDD8	32.782	10.995	0.0005	1.19048	PeIDD9	31.524	9.737	0.0012	0.774194	PeIDD10	31.461
PEG5H	PEACTIN	25.21	PeIDD1	30.298	5.08811	0.0293986	1.34609	PeIDD2	27.983	2.773	0.146	2.53913	PeIDD3	32.266	7.056	0.008	1.88235	PeIDD4	28.842	3.632	0.081	0.324065	PeIDD5	28.595	3.385	0.096	7.54717	PeIDD6	33.472	8.262	0.0033	2.12903	PeIDD7	31.479	6.269	0.013	2.29682	PeIDD8	34.638	9.429	0.0015	3.57143	PeIDD9	33.859	8.649	0.0025	1.6129	PeIDD10	32.394
PEG5H	PEACTIN	25.398	PeIDD1	30.348	4.94985	0.0323553	1.48147	PeIDD2	27.983	2.585	0.167	2.90435	PeIDD3	32.565	7.167	0.007	1.64706	PeIDD4	29.364	3.966	0.064	0.256051	PeIDD5	29.011	3.613	0.082	6.44654	PeIDD6	33.437	8.039	0.0038	2.45161	PeIDD7	31.78	6.382	0.012	2.12014	PeIDD8	34.284	8.886	0.0021	5	PeIDD9	33.912	8.514	0.0027	1.74194	PeIDD10	32.692
PEG5H	PEACTIN	25.45	PeIDD1	30.459	5.00942	0.0310466	1.42155	PeIDD2	28.417	2.967	0.128	2.22609	PeIDD3	32.467	7.017	0.008	1.88235	PeIDD4	29.211	3.761	0.074	0.296059	PeIDD5	28.88	3.431	0.093	7.31132	PeIDD6	33.459	8.009	0.0039	2.51613	PeIDD7	31.872	6.422	0.012	2.12014	PeIDD8	34.446	8.997	0.002	4.7619	PeIDD9	34.104	8.654	0.0025	1.6129	PeIDD10	32.638
PEG10H	PEACTIN	23.857	PeIDD1	28.392	4.53489	0.0431381	1.97519	PeIDD2	26.504	2.646	0.16	2.78261	PeIDD3	31.118	7.261	0.007	1.64706	PeIDD4	26.53	2.672	0.157	0.628126	PeIDD5	27.762	3.905	0.067	5.2673	PeIDD6	32.198	8.341	0.0031	2	PeIDD7	29.831	5.973	0.016	2.82686	PeIDD8	33.245	9.387	0.0015	3.57143	PeIDD9	33.986	10.128	0.0009	0.580645	PeIDD10	32.539
PEG10H	PEACTIN	24.528	PeIDD1	28.91	4.3815	0.0479775	2.19677	PeIDD2	27.15	2.622	0.162	2.81739	PeIDD3	31.408	6.88	0.008	1.88235	PeIDD4	27.177	2.649	0.159	0.636127	PeIDD5	28.35	3.822	0.071	5.58176	PeIDD6	32.848	8.32	0.0031	2	PeIDD7	30.534	6.006	0.016	2.82686	PeIDD8	33.844	9.316	0.0016	3.80952	PeIDD9	34.215	9.687	0.0012	0.774194	PeIDD10	33.3
PEG10H	PEACTIN	24.504	PeIDD1	29.045	4.54072	0.0429642	1.96723	PeIDD2	27.018	2.514	0.175	3.04348	PeIDD3	31.983	7.48	0.006	1.41176	PeIDD4	26.914	2.41	0.188	0.75215	PeIDD5	28.222	3.718	0.076	5.97484	PeIDD6	32.695	8.191	0.0034	2.19355	PeIDD7	30.179	5.675	0.02	3.53357	PeIDD8	33.728	9.225	0.0017	4.04762	PeIDD9	34.118	9.614	0.0013	0.83871	PeIDD10	33.299
4-0H	PEACTIN	24.446	PeIDD1	29.865	5.41869	0.0233783	1.07044	PeIDD2	28.546	4.09944	0.0583373	1.01456	PeIDD3	32.487	8.04132	0.00379597	0.893169	PeIDD4	26.387	1.9411	0.260418	1.04188	PeIDD5	30.544	6.09831	0.0145958	1.14747	PeIDD6	33.684	9.23821	0.00165586	1.06829	PeIDD7	32.113	7.6673	0.00491939	0.869151	PeIDD8	35.234	10.7883	0.000565452	1.34631	PeIDD9	33.654	9.20831	0.00169053	1.09067	PeIDD10	32.925
4-0H	PEACTIN	23.739	PeIDD1	29.165	5.42557	0.023267	1.06534	PeIDD2	28.164	4.42509	0.0465496	0.809558	PeIDD3	31.637	7.89778	0.00419306	0.986603	PeIDD4	25.843	2.10354	0.232687	0.930933	PeIDD5	30.246	6.5068	0.0109966	0.86451	PeIDD6	33.11	9.37075	0.00151051	0.974522	PeIDD7	31.678	7.9386	0.00407609	0.720156	PeIDD8	35.505	11.7661	0.000287106	0.683586	PeIDD9	33.259	9.52028	0.00136179	0.878575	PeIDD10	32.586
4-0H	PEACTIN	24.163	PeIDD1	29.776	5.61228	0.0204426	0.936015	PeIDD2	28.484	4.32018	0.0500607	0.870621	PeIDD3	32.198	8.03429	0.00381449	0.897527	PeIDD4	26.144	1.98017	0.25346	1.01404	PeIDD5	30.332	6.16813	0.0139062	1.09325	PeIDD6	33.383	9.21998	0.00167691	1.08188	PeIDD7	32.255	8.092	0.00366492	0.647512	PeIDD8	35.475	11.312	0.00039332	0.936476	PeIDD9	33.51	9.34678	0.00153581	0.990846	PeIDD10	32.743
4-1H	PEACTIN	24.684	PeIDD1	29.93	4.94573	0.0250728	1.14802	PeIDD2	28.395	3.71	0.076	1.32174	PeIDD3	32.748	8.064	0.004	0.941176	PeIDD4	26.692	2.007	0.249	0.996199	PeIDD5	30.185	5.501	0.022	1.72956	PeIDD6	37.618	12.933	0.00013	0.083871	PeIDD7	30.097	5.413	0.023	4.0636	PeIDD8	31.664	6.98	0.0079	18.8095	PeIDD9	33.782	9.098	0.0018	1.16129	PeIDD10	32.592
4-1H	PEACTIN	24.626	PeIDD1	30.048	5.42163	0.0233306	1.06825	PeIDD2	28.397	3.771	0.073	1.26957	PeIDD3	32.4	7.774	0.005	1.17647	PeIDD4	26.688	2.062	0.239	0.956191	PeIDD5	30.057	5.432	0.023	1.80818	PeIDD6	38.012	13.386	9e-05	0.0580645	PeIDD7	29.809	5.183	0.028	4.947	PeIDD8	31.853	7.227	0.0067	15.9524	PeIDD9	33.566	8.94	0.002	1.29032	PeIDD10	32.494
4-1H	PEACTIN	24.709	PeIDD1	30.051	5.24166	0.0223274	1.02232	PeIDD2	28.534	3.825	0.071	1.23478	PeIDD3	32.664	7.955	0.004	0.941176	PeIDD4	26.874	2.164	0.223	0.892178	PeIDD5	30.516	5.807	0.018	1.41509	PeIDD6	38.215	13.506	9e-05	0.0580645	PeIDD7	29.762	5.053	0.03	5.30035	PeIDD8	31.83	7.121	0.0072	17.1429	PeIDD9	34.035	9.325	0.0016	1.03226	PeIDD10	32.81
4-5H	PEACTIN	24.831	PeIDD1	31.979	7.14873	0.00704723	0.322676	PeIDD2	28.511	3.68	0.078	1.35652	PeIDD3	32.142	7.311	0.006	1.41176	PeIDD4	29.406	4.575	0.042	0.168034	PeIDD5	31.317	6.486	0.011	0.86478	PeIDD6	34.813	9.982	0.001	0.645161	PeIDD7	29.991	5.16	0.028	4.947	PeIDD8	32.386	7.555	0.0053	12.619	PeIDD9	33.469	8.638	0.0025	1.6129	PeIDD10	34.25
4-5H	PEACTIN	24.978	PeIDD1	31.893	6.9142	0.00829121	0.379634	PeIDD2	28.164	3.186	0.11	1.91304	PeIDD3	32.439	7.461	0.006	1.41176	PeIDD4	29.36	4.382	0.048	0.192038	PeIDD5	31.05	6.071	0.015	1.17925	PeIDD6	35.327	10.349	0.0008	0.516129	PeIDD7	30.051	5.073	0.03	5.30035	PeIDD8	32.699	7.721	0.0047	11.1905	PeIDD9	33.863	8.885	0.0021	1.35484	PeIDD10	34.725
4-5H	PEACTIN	24.966	PeIDD1	32.798	7.83182	0.00438922	0.200971	PeIDD2	28.649	3.683	0.078	1.35652	PeIDD3	32.177	7.211	0.007	1.64706	PeIDD4	29.18	4.214	0.054	0.216043	PeIDD5	30.766	5.8	0.018	1.41509	PeIDD6	36.186	11.22	0.0004	0.258065	PeIDD7	29.986	5.02	0.031	5.47703	PeIDD8	32.809	7.843	0.0044	10.4762	PeIDD9	34.116	9.15	0.0018	1.16129	PeIDD10	34.445
4-10H	PEACTIN	24.126	PeIDD1	29.951	5.8252	0.0176376	0.807582	PeIDD2	28.845	4.718	0.038	0.66087	PeIDD3	32.068	7.942	0.004	0.941176	PeIDD4	27.289	3.163	0.112	0.44809	PeIDD5	31.467	7.341	0.006	0.471698	PeIDD6	33.774	9.647	0.0012	0.774194	PeIDD7	29.753	5.627	0.02	3.53357	PeIDD8	32.16	8.034	0.0038	9.04762	PeIDD9	32.161	8.035	0.0038	2.45161	PeIDD10	33.239
4-10H	PEACTIN	24.082	PeIDD1	30.834	6.75108	0.00928374	0.42508	PeIDD2	28.627	4.545	0.043	0.747826	PeIDD3	32.24	8.157	0.004	0.941176	PeIDD4	27.185	3.103	0.116	0.464093	PeIDD5	30.932	6.85	0.009	0.707547	PeIDD6	33.54	9.458	0.0014	0.903226	PeIDD7	29.324	5.242	0.026	4.59364	PeIDD8	32.419	8.336	0.0031	7.38095	PeIDD9	32.23	8.147	0.0035	2.25806	PeIDD10	33.539
4-10H	PEACTIN	24.12	PeIDD1	30.943	6.82304	0.00883203	0.404397	PeIDD2	28.631	4.511	0.044	0.765217	PeIDD3	32.695	8.575	0.003	0.705882	PeIDD4	27.284	3.164	0.112	0.44809	PeIDD5	30.671	6.551	0.011	0.86478	PeIDD6	33.645	9.524	0.0014	0.903226	PeIDD7	29.843	5.722	0.019	3.35689	PeIDD8	32.845	8.724	0.0024	5.71429	PeIDD9	32.208	8.088	0.0037	2.3871	PeIDD10	34.065
[truncated: 3 more columns]
